# Supplementary material for: Quercetin Alleviates the Progression of Breast Cancer-Related Depression via Inhibiting the Pyroptosis and Promoting the Immune Response
Source: Hindawi journal article supplement (doi:10.1155/2022/8011988), 2022-03-03
Supplement: f1 [file 8011988.f1.pdf]

**Table 2. The information of key ingredients**

| <b>MOL<br/>ID</b> | <b>Name</b>                                                                                    | <b>Average<br/>Shortest<br/>Path<br/>Length</b> | <b>Between<br/>ness<br/>Centrali<br/>ty</b> | <b>Closeness<br/>Centrality</b> | <b>Deg<br/>ree</b> |
|-------------------|------------------------------------------------------------------------------------------------|-------------------------------------------------|---------------------------------------------|---------------------------------|--------------------|
| MOL00<br>0098     | quercetin                                                                                      | 1.979798                                        | 0.130149                                    | 0.505102                        | 100                |
| MOL00<br>0006     | luteolin                                                                                       | 2.410774                                        | 0.021713                                    | 0.414804                        | 38                 |
| MOL00<br>0422     | kaempferol                                                                                     | 2.3367                                          | 0.030765                                    | 0.427954                        | 37                 |
| MOL00<br>0358     | beta-sitosterol                                                                                | 2.451178                                        | 0.014165                                    | 0.407967                        | 24                 |
| MOL00<br>4328     | naringenin                                                                                     | 2.545455                                        | 0.011223                                    | 0.392857                        | 22                 |
| MOL00<br>0392     | formononetin                                                                                   | 2.538721                                        | 0.003915                                    | 0.393899                        | 19                 |
| MOL00<br>0497     | licochalcone a                                                                                 | 2.531987                                        | 0.00575                                     | 0.394947                        | 19                 |
| MOL00<br>3896     | 7-Methoxy-2-methyl<br>isoflavone                                                               | 2.538721                                        | 0.003108                                    | 0.393899                        | 19                 |
| MOL00<br>2565     | Medicarpin                                                                                     | 2.552189                                        | 0.004666                                    | 0.391821                        | 18                 |
| MOL00<br>4978     | 2-[(3R)-8,8-dimethyl-<br>3,4-dihydro-2H-<br>pyrano[6,5-f]chromen-<br>3-yl]-5-<br>methoxyphenol | 2.538721                                        | 0.002232                                    | 0.393899                        | 18                 |
| MOL00             | Vestitol                                                                                       | 2.552189                                        | 0.002592                                    | 0.391821                        | 17                 |

---

|       |                     |          |          |          |    |
|-------|---------------------|----------|----------|----------|----|
| 0500  |                     |          |          |          |    |
| MOL00 | bicuculline         | 2.558923 | 0.007969 | 0.390789 | 17 |
| 0791  |                     |          |          |          |    |
| MOL00 | shinpterocarpin     | 2.552189 | 0.003206 | 0.391821 | 17 |
| 4891  |                     |          |          |          |    |
| MOL00 | 1-                  | 2.558923 | 0.001332 | 0.390789 | 16 |
| 4959  | Methoxyphaseollidin |          |          |          |    |
| MOL00 | Licoagrocarpin      | 2.552189 | 0.001357 | 0.391821 | 16 |
| 5003  |                     |          |          |          |    |
| MOL00 | Stigmasterol        | 2.478114 | 0.013133 | 0.403533 | 15 |
| 0449  |                     |          |          |          |    |
| MOL00 | Fumarine            | 2.585859 | 0.002985 | 0.386719 | 15 |
| 0787  |                     |          |          |          |    |
| MOL00 | HMO                 | 2.565657 | 0.00134  | 0.389764 | 15 |
| 4957  |                     |          |          |          |    |
| MOL00 | 3'-Hydroxy-4'-O-    | 2.565657 | 0.001284 | 0.389764 | 15 |
| 4966  | Methylglabridin     |          |          |          |    |
| MOL00 | 3'-Methoxyglabridin | 2.565657 | 0.001221 | 0.389764 | 15 |
| 4974  |                     |          |          |          |    |
| MOL00 | Glypallichalcone    | 2.572391 | 0.001208 | 0.388743 | 14 |
| 4835  |                     |          |          |          |    |
| MOL00 | Glyasperins M       | 2.579125 | 0.001144 | 0.387728 | 14 |
| 5007  |                     |          |          |          |    |
| MOL00 | isorhamnetin        | 2.592593 | 7.30E-04 | 0.385714 | 13 |
| 0354  |                     |          |          |          |    |
| MOL00 | Glyasperin C        | 2.579125 | 5.99E-04 | 0.387728 | 13 |
| 4811  |                     |          |          |          |    |
| MOL00 | Glepidotin A        | 2.579125 | 7.62E-04 | 0.387728 | 13 |
| 4828  |                     |          |          |          |    |

---

|               |                                                                                                     |          |          |          |    |
|---------------|-----------------------------------------------------------------------------------------------------|----------|----------|----------|----|
| MOL00<br>4833 | Phaseolinisoflavan                                                                                  | 2.572391 | 8.08E-04 | 0.388743 | 13 |
| MOL00<br>4912 | Glabrone                                                                                            | 2.579125 | 5.53E-04 | 0.387728 | 13 |
| MOL00<br>4991 | 7-Acetoxy-2-methylisoflavone                                                                        | 2.585859 | 7.06E-04 | 0.386719 | 13 |
| MOL00<br>4824 | (2S)-6-(2,4-dihydroxyphenyl)-2-(2-hydroxypropan-2-yl)-4-methoxy-2,3-dihydrofuro[3,2-g]chromen-7-one | 2.592593 | 5.07E-04 | 0.385714 | 12 |
| MOL00<br>4849 | 3-(2,4-dihydroxyphenyl)-8-(1,1-dimethylprop-2-enyl)-7-hydroxy-5-methoxy-coumarin                    | 2.592593 | 5.39E-04 | 0.385714 | 12 |
| MOL00<br>4908 | Glabridin                                                                                           | 2.585859 | 6.65E-04 | 0.386719 | 12 |
| MOL00<br>4911 | Glabrene                                                                                            | 2.585859 | 4.75E-04 | 0.386719 | 12 |
| MOL00<br>0417 | Calycosin                                                                                           | 2.599327 | 3.69E-04 | 0.384715 | 11 |
| MOL00<br>0737 | morin                                                                                               | 2.606061 | 0.00326  | 0.383721 | 11 |
| MOL00<br>3656 | Lupiwighteone                                                                                       | 2.592593 | 3.48E-04 | 0.385714 | 11 |
| MOL00<br>4808 | glyasperin B                                                                                        | 2.599327 | 4.45E-04 | 0.384715 | 11 |

|               |                                                                         |          |          |          |    |
|---------------|-------------------------------------------------------------------------|----------|----------|----------|----|
| MOL00<br>4810 | glyasperin F                                                            | 2.599327 | 3.52E-04 | 0.384715 | 11 |
| MOL00<br>4815 | (E)-1-(2,4-dihydroxyphenyl)-3-(2,2-dimethylchromen-6-yl)prop-2-en-1-one | 2.599327 | 3.52E-04 | 0.384715 | 11 |
| MOL00<br>4820 | kanzonols W                                                             | 2.599327 | 3.52E-04 | 0.384715 | 11 |
| MOL00<br>4856 | Gancaonin A                                                             | 2.592593 | 3.92E-04 | 0.385714 | 11 |
| MOL00<br>4857 | Gancaonin B                                                             | 2.592593 | 4.78E-04 | 0.385714 | 11 |
| MOL00<br>4864 | 5,7-dihydroxy-3-(4-methoxyphenyl)-8-(3-methylbut-2-enyl)chromone        | 2.599327 | 3.94E-04 | 0.384715 | 11 |
| MOL00<br>4885 | licoisoflavanone                                                        | 2.599327 | 3.98E-04 | 0.384715 | 11 |
| MOL00<br>4907 | Glyzaglabrin                                                            | 2.606061 | 4.27E-04 | 0.383721 | 11 |
| MOL00<br>4915 | Eurycarpin A                                                            | 2.592593 | 3.48E-04 | 0.385714 | 11 |
| MOL00<br>4961 | Quercetin der.                                                          | 2.599327 | 3.36E-04 | 0.384715 | 11 |
| MOL00<br>5000 | Gancaonin G                                                             | 2.599327 | 4.44E-04 | 0.384715 | 11 |
| MOL00<br>5012 | Licoagroisoflavone                                                      | 2.592593 | 3.48E-04 | 0.385714 | 11 |

|               |                                                                                                    |          |          |          |    |
|---------------|----------------------------------------------------------------------------------------------------|----------|----------|----------|----|
| MOL00<br>5016 | Odoratin                                                                                           | 2.599327 | 3.36E-04 | 0.384715 | 11 |
| MOL00<br>4805 | (2S)-2-[4-hydroxy-3-(3-methylbut-2-enyl)phenyl]-8,8-dimethyl-2,3-dihydropyrano[2,3-f]chromen-4-one | 2.612795 | 3.13E-04 | 0.382732 | 10 |
| MOL00<br>4841 | Licochalcone B                                                                                     | 2.606061 | 2.93E-04 | 0.383721 | 10 |
| MOL00<br>4848 | licochalcone G                                                                                     | 2.612795 | 3.21E-04 | 0.382732 | 10 |
| MOL00<br>4879 | Glycyrin                                                                                           | 2.606061 | 4.15E-04 | 0.383721 | 10 |
| MOL00<br>4990 | 7,2',4'-trihydroxy-5-methoxy-3-arylcoumarin                                                        | 2.612795 | 2.55E-04 | 0.382732 | 10 |
| MOL00<br>5020 | dehydroglyasperins C                                                                               | 2.599327 | 3.34E-04 | 0.384715 | 10 |
| MOL00<br>0049 | 3 $\beta$ -<br>acetoxylatractylone                                                                 | 2.612795 | 8.12E-04 | 0.382732 | 9  |
| MOL00<br>0296 | hederagenin                                                                                        | 2.552189 | 0.005173 | 0.391821 | 9  |
| MOL00<br>4827 | Semilicoisoflavone B                                                                               | 2.612795 | 2.69E-04 | 0.382732 | 9  |
| MOL00<br>4883 | Licoisoflavone                                                                                     | 2.612795 | 3.04E-04 | 0.382732 | 9  |
| MOL00<br>4884 | Licoisoflavone B                                                                                   | 2.619529 | 2.36E-04 | 0.381748 | 9  |

|               |                                                                                      |          |          |          |   |
|---------------|--------------------------------------------------------------------------------------|----------|----------|----------|---|
| MOL00<br>4980 | Inflacoumarin A                                                                      | 2.606061 | 3.27E-04 | 0.383721 | 9 |
| MOL00<br>5008 | Glycyrrhiza flavonol<br>A                                                            | 2.612795 | 2.67E-04 | 0.382732 | 9 |
| MOL00<br>5321 | Frutinone A                                                                          | 2.612795 | 3.88E-04 | 0.382732 | 9 |
| MOL00<br>1484 | Inermine                                                                             | 2.639731 | 7.44E-04 | 0.378827 | 8 |
| MOL00<br>3370 | Onjixanthone I                                                                       | 2.632997 | 4.67E-04 | 0.379795 | 8 |
| MOL00<br>4814 | Isotrifoliol                                                                         | 2.632997 | 2.38E-04 | 0.379795 | 8 |
| MOL00<br>4855 | Licoricone                                                                           | 2.626263 | 2.82E-04 | 0.380769 | 8 |
| MOL00<br>4863 | 3-(3,4-<br>dihydroxyphenyl)-5,7-<br>dihydroxy-8-(3-<br>methylbut-2-<br>enyl)chromone | 2.626263 | 1.62E-04 | 0.380769 | 8 |
| MOL00<br>4904 | licopyranocoumarin                                                                   | 2.626263 | 2.64E-04 | 0.380769 | 8 |
| MOL00<br>4945 | (2S)-7-hydroxy-2-(4-<br>hydroxyphenyl)-8-(3-<br>methylbut-2-<br>enyl)chroman-4-one   | 2.619529 | 2.34E-04 | 0.381748 | 8 |
| MOL00<br>0239 | Jaranol                                                                              | 2.626263 | 1.58E-04 | 0.380769 | 7 |
| MOL00<br>2311 | Glycyrol                                                                             | 2.646465 | 1.59E-04 | 0.377863 | 7 |

|               |                                                                                      |          |          |          |   |
|---------------|--------------------------------------------------------------------------------------|----------|----------|----------|---|
| MOL00<br>3648 | Inermin                                                                              | 2.653199 | 5.29E-04 | 0.376904 | 7 |
| MOL00<br>4609 | Areapillin                                                                           | 2.619529 | 1.69E-04 | 0.381748 | 7 |
| MOL00<br>4806 | euchrenone                                                                           | 2.632997 | 1.88E-04 | 0.379795 | 7 |
| MOL00<br>4866 | 2-(3,4-<br>dihydroxyphenyl)-5,7-<br>dihydroxy-6-(3-<br>methylbut-2-<br>enyl)chromone | 2.619529 | 2.06E-04 | 0.381748 | 7 |
| MOL00<br>4910 | Glabranin                                                                            | 2.632997 | 2.48E-04 | 0.379795 | 7 |
| MOL00<br>4949 | Isolicoflavonol                                                                      | 2.632997 | 1.27E-04 | 0.379795 | 7 |
| MOL00<br>5017 | Phaseol                                                                              | 2.639731 | 1.70E-04 | 0.378827 | 7 |
| MOL00<br>5344 | ginsenoside rh2                                                                      | 2.666667 | 0.001238 | 0.375    | 7 |
| MOL00<br>5384 | suchilactone                                                                         | 2.646465 | 3.86E-04 | 0.377863 | 7 |
| MOL00<br>0490 | petunidin                                                                            | 2.653199 | 8.98E-05 | 0.376904 | 6 |
| MOL00<br>0522 | arctiin                                                                              | 2.653199 | 2.05E-04 | 0.376904 | 6 |
| MOL00<br>1792 | DFV                                                                                  | 2.639731 | 2.51E-04 | 0.378827 | 6 |
| MOL00<br>2844 | Pinocembrin                                                                          | 2.639731 | 2.51E-04 | 0.378827 | 6 |

|               |                                                                                                           |          |          |          |   |
|---------------|-----------------------------------------------------------------------------------------------------------|----------|----------|----------|---|
| MOL00<br>3330 | (-)-Phillygenin                                                                                           | 2.646465 | 2.60E-04 | 0.377863 | 6 |
| MOL00<br>4598 | 3,5,6,7-tetramethoxy-<br>2-(3,4,5-<br>trimethoxyphenyl)chro<br>mone                                       | 2.639731 | 1.35E-04 | 0.378827 | 6 |
| MOL00<br>4829 | Glepidotin B                                                                                              | 2.639731 | 2.04E-04 | 0.378827 | 6 |
| MOL00<br>4898 | (E)-3-[3,4-dihydroxy-<br>5-(3-methylbut-2-<br>enyl)phenyl]-1-(2,4-<br>dihydroxyphenyl)prop<br>-2-en-1-one | 2.646465 | 8.07E-05 | 0.377863 | 6 |
| MOL00<br>4941 | (2R)-7-hydroxy-2-(4-<br>hydroxyphenyl)chrom<br>an-4-one                                                   | 2.639731 | 2.51E-04 | 0.378827 | 6 |
| MOL00<br>4948 | Isoglycyrol                                                                                               | 2.639731 | 9.81E-05 | 0.378827 | 6 |
| MOL00<br>5308 | Aposiopolamine                                                                                            | 2.936027 | 2.52E-04 | 0.340596 | 6 |
| MOL00<br>3322 | FORSYTHINOL                                                                                               | 2.659933 | 1.23E-04 | 0.375949 | 5 |
| MOL00<br>4798 | delphinidin                                                                                               | 2.659933 | 1.19E-04 | 0.375949 | 5 |
| MOL00<br>4913 | 1,3-dihydroxy-9-<br>methoxy-6-<br>benzofurano[3,2-<br>c]chromenone                                        | 2.835017 | 2.48E-05 | 0.352732 | 5 |
| MOL00         | 1,3-dihydroxy-8,9-                                                                                        | 2.814815 | 2.76E-05 | 0.355263 | 5 |



|           |                                                       |          |          |          |   |
|-----------|-------------------------------------------------------|----------|----------|----------|---|
| 4914      | dimethoxy-6-benzofurano[3,2-c]chromenone              |          |          |          |   |
| MOL004988 | Kanzonol F                                            | 2.646465 | 7.90E-05 | 0.377863 | 5 |
| MOL004989 | 6-prenylated eriodictyol                              | 2.646465 | 7.86E-05 | 0.377863 | 5 |
| MOL005001 | Gancaonin H                                           | 2.646465 | 1.23E-04 | 0.377863 | 5 |
| MOL005018 | Xambioona                                             | 2.653199 | 6.59E-05 | 0.376904 | 5 |
| MOL005356 | Girinimbin                                            | 2.666667 | 1.17E-04 | 0.375    | 5 |
| MOL000492 | (+)-catechin                                          | 2.666667 | 4.64E-04 | 0.375    | 4 |
| MOL000493 | campesterol                                           | 2.606061 | 0.002357 | 0.383721 | 4 |
| MOL003347 | hyperforin                                            | 3.420875 | 4.16E-05 | 0.292323 | 4 |
| MOL004653 | (+)-Anomalin                                          | 2.673401 | 8.38E-05 | 0.374055 | 4 |
| MOL004838 | 8-(6-hydroxy-2-benzofuranyl)-2,2-dimethyl-5-chromenol | 2.666667 | 7.98E-05 | 0.375    | 4 |
| MOL004882 | Licocoumarone                                         | 2.814815 | 1.86E-05 | 0.355263 | 4 |
| MOL004903 | liquiritin                                            | 2.680135 | 3.34E-04 | 0.373116 | 4 |
| MOL00     | Sigmoidin-B                                           | 2.659933 | 8.24E-05 | 0.375949 | 4 |

|       |                                                                                                                                 |          |          |          |   |
|-------|---------------------------------------------------------------------------------------------------------------------------------|----------|----------|----------|---|
| 4935  |                                                                                                                                 |          |          |          |   |
| MOL00 | 8-prenylated                                                                                                                    | 2.653199 | 5.73E-05 | 0.376904 | 4 |
| 4993  | eriodictyol                                                                                                                     |          |          |          |   |
| MOL01 | Cubebin                                                                                                                         | 2.666667 | 7.38E-05 | 0.375    | 4 |
| 3187  |                                                                                                                                 |          |          |          |   |
| MOL00 | sitosterol                                                                                                                      | 3.313131 | 1.71E-04 | 0.301829 | 2 |
| 0359  |                                                                                                                                 |          |          |          |   |
| MOL00 | CLR                                                                                                                             | 3.313131 | 1.71E-04 | 0.301829 | 2 |
| 0953  |                                                                                                                                 |          |          |          |   |
| MOL00 | Linoleyl acetate                                                                                                                | 2.700337 | 6.26E-06 | 0.370324 | 2 |
| 1645  |                                                                                                                                 |          |          |          |   |
| MOL00 | (3S,5R,8R,9R,10S,14S                                                                                                            | 3.313131 | 1.71E-04 | 0.301829 | 2 |
| 1919  | )-3,17-dihydroxy-<br>4,4,8,10,14-<br>pentamethyl-<br>2,3,5,6,7,9-hexahydro-<br>1H-<br>cyclopenta[a]phenanth<br>rene-15,16-dione |          |          |          |   |
| MOL00 | paeoniflorin                                                                                                                    | 3.441077 | 1.22E-05 | 0.290607 | 2 |
| 1924  |                                                                                                                                 |          |          |          |   |
| MOL00 | Diop                                                                                                                            | 3.003367 | 4.50E-06 | 0.33296  | 2 |
| 2879  |                                                                                                                                 |          |          |          |   |
| MOL00 | Spinasterol                                                                                                                     | 3.313131 | 1.71E-04 | 0.301829 | 2 |
| 4355  |                                                                                                                                 |          |          |          |   |
| MOL00 | Longikaurin A                                                                                                                   | 3.313131 | 1.84E-05 | 0.301829 | 2 |
| 4624  |                                                                                                                                 |          |          |          |   |
| MOL00 | $\alpha$ -spinasterol                                                                                                           | 3.313131 | 1.71E-04 | 0.301829 | 2 |
| 4718  |                                                                                                                                 |          |          |          |   |

|               |                                                                                                                                                            |          |          |          |   |
|---------------|------------------------------------------------------------------------------------------------------------------------------------------------------------|----------|----------|----------|---|
| MOL00<br>4924 | (-)-Medicocarpin                                                                                                                                           | 2.700337 | 1.89E-05 | 0.370324 | 2 |
| MOL00<br>5317 | Deoxyharringtonine                                                                                                                                         | 2.888889 | 9.56E-04 | 0.346154 | 2 |
| MOL00<br>5318 | Dianthramine                                                                                                                                               | 2.700337 | 6.26E-06 | 0.370324 | 2 |
| MOL00<br>5320 | arachidonate                                                                                                                                               | 2.700337 | 6.26E-06 | 0.370324 | 2 |
| MOL00<br>6767 | Vulgaxanthin-I                                                                                                                                             | 2.700337 | 5.70E-06 | 0.370324 | 2 |
| MOL00<br>0022 | 14-acetyl-12-senecioyl-2E,8Z,10E-atractylentriol                                                                                                           | 2.707071 | 0        | 0.369403 | 1 |
| MOL00<br>0033 | (3S,8S,9S,10R,13R,14S,17R)-10,13-dimethyl-17-[(2R,5S)-5-propan-2-yl]octan-2-yl]-2,3,4,7,8,9,11,12,14,15,16,17-dodecahydro-1H-cyclopenta[a]phenanthren-3-ol | 3.353535 | 0        | 0.298193 | 1 |
| MOL00<br>0072 | 8 $\beta$ -ethoxyatractylenolide III                                                                                                                       | 2.707071 | 0        | 0.369403 | 1 |
| MOL00<br>0211 | Mairin                                                                                                                                                     | 3.353535 | 0        | 0.298193 | 1 |
| MOL00<br>0273 | (2R)-2-[(3S,5R,10S,13R,14R,                                                                                                                                | 3.393939 | 0        | 0.294643 | 1 |

---

|               |                                                                                                                                             |          |   |          |   |
|---------------|---------------------------------------------------------------------------------------------------------------------------------------------|----------|---|----------|---|
|               | 16R,17R)-3,16-dihydroxy-4,4,10,13,14-pentamethyl-2,3,5,6,12,15,16,17-octahydro-1H-cyclopenta[a]phenanthren-17-yl]-6-methylhept-5-enoic acid |          |   |          |   |
| MOL00<br>0275 | trametenolic acid                                                                                                                           | 3.393939 | 0 | 0.294643 | 1 |
| MOL00<br>0279 | Cerevisterol                                                                                                                                | 3.393939 | 0 | 0.294643 | 1 |
| MOL00<br>0282 | ergosta-7,22E-dien-3beta-ol                                                                                                                 | 3.353535 | 0 | 0.298193 | 1 |
| MOL00<br>0283 | Ergosterol peroxide                                                                                                                         | 3.353535 | 0 | 0.298193 | 1 |
| MOL00<br>2776 | Baicalin                                                                                                                                    | 3.043771 | 0 | 0.32854  | 1 |
| MOL00<br>3315 | 3beta-Acetyl-20,25-epoxydammarane-24alpha-ol                                                                                                | 3.454545 | 0 | 0.289474 | 1 |
| MOL00<br>5348 | Ginsenoside-Rh4_qt                                                                                                                          | 3.393939 | 0 | 0.294643 | 1 |
| MOL00<br>5376 | Panaxadiol                                                                                                                                  | 3.454545 | 0 | 0.289474 | 1 |
| MOL00<br>5399 | alexandrin_qt                                                                                                                               | 3.353535 | 0 | 0.298193 | 1 |

---

---

|       |                  |          |   |          |   |
|-------|------------------|----------|---|----------|---|
| MOL00 | poriferasterol   | 3.353535 | 0 | 0.298193 | 1 |
| 6772  | monoglucoside_qt |          |   |          |   |
| MOL00 | stigmast-7-enol  | 3.353535 | 0 | 0.298193 | 1 |
| 6774  |                  |          |   |          |   |

---
