# Supplementary material for: Quercetin Alleviates the Progression of Breast Cancer-Related Depression via Inhibiting the Pyroptosis and Promoting the Immune Response
Source: Hindawi journal article supplement (doi:10.1155/2022/8011988), 2022-03-03
Supplement: f5 [file 8011988.f5.pdf]

**A**

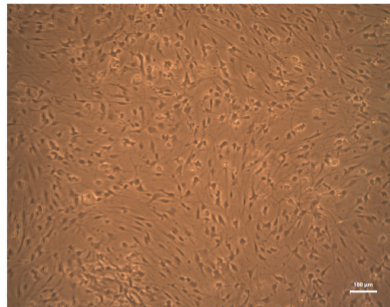

Primary Mouse Cortical Neurons

**B**

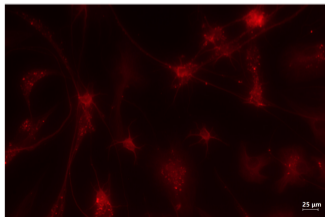

NSE

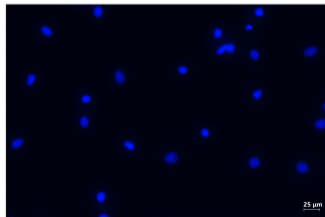

DAPI

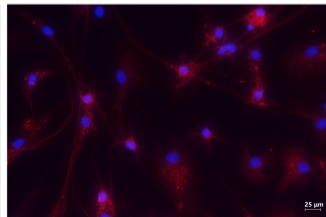

Merge
